# Supplementary material
Source: MDPI journal article supplement (https://www.mdpi.com/2079-6412/12/1/101)
Supplement: s1 [file s1]

# Supplementary Materials: Structural and Electrical Properties of Atomic Layer Deposited PtRu Bimetallic Alloy Thin Films

Hyun-Jae Woo <sup>1,†</sup>, Woo-Jae Lee <sup>1,†</sup>, Chang-Min Kim <sup>1</sup>, Qimin Wang <sup>2</sup>, Shihong Zhang <sup>3</sup>, Yong-Jin Yoon <sup>4,\*</sup> and Se-Hun Kwon <sup>1,\*</sup>

- <sup>1</sup> School of Materials Science and Engineering, Pusan National University, Busan 46241, Korea; present\_w@naver.com (H.-J.W.); woojl@pusan.ac.kr (W.-J.L.); changmin.kim0317@gmail.com (C.-M.K.)
- <sup>2</sup> School of Electromechanical Engineering, Guangdong University of Technology, Guangzhou 510006, China; qmwang@gdut.edu.cn (Q.W.)
- <sup>3</sup> School of Materials Science and Engineering, Anhui University of Technology, Maanshan 243002, China; tougaoyouxiang206@163.com (S.Z.)
- <sup>4</sup> Department of Mechanical Engineering, Korea Advanced Institute of Science and Technology, 291 Daehak-ro, Yuseong-gu, Daejeon 34141, Korea
- \* Correspondence: yongjiny@kaist.ac.kr (Y.-J.Y.); sehun@pusan.ac.kr (S.-H.K.)
- † These authors contributed equally to this work.

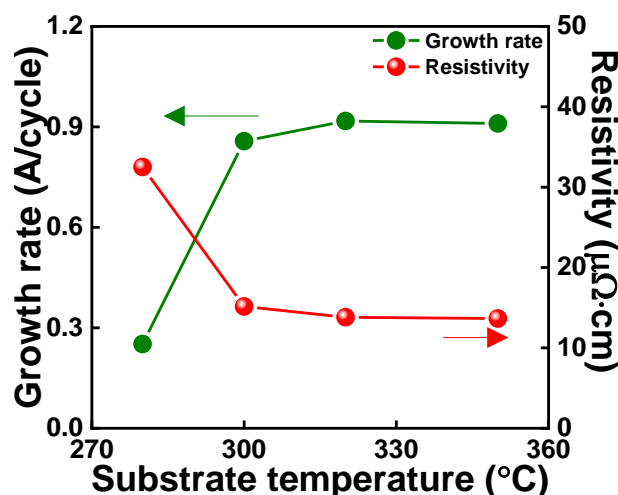

**Figure S1.** The growth rate and resistivity of ALD-Ru thin films using Carish precursor as a function of the deposition temperature. .

In order to prepare PtRu bimetallic alloy thin films by ALD, the ALD temperature windows of Pt and Ru should overlap. In our previous study [1], a typical ALD temperature window was appeared at between 280 and 340 °C for Pt process using DDAP precursor. For the Ru thin films using Carish precursor, a typical ALD temperature window was appeared at between 320 and 350 °C, as shown in Figure S1. Therefore, a proper ALD temperature range for ALD-PtRu bimetallic alloy thin films was determined to be from 320 to 340 °C. Considering the stable growth rate as well as lower electrical resistivities, the growth temperature of 340 °C was used to prepare ALD-PtRu bimetallic thin films.

## References

1. Lee, W.J.; Wan, Z.; Kim C.-M.; Oh, I.-K.; Harada, R.; Suzuki, K.; Choi, E.-A.; Kwon, S.-H. Atomic Layer Deposition of Pt Thin Films Using Dimethyl (N,N-Dimethyl-3-Butene-1-Amine-N) Platinum and O<sub>2</sub> Reactant. *Chem. Mater.* **2019**, *31*, 5056.
